# Supplementary material for: Acetylation modification regulates GRP78 secretion in colon cancer cells
Source: PubMed Central journal article supplement (PMC4961953; doi:10.1038/srep30406), 2016-07-27

## Supplementary Information

### **Acetylation modification regulates GRP78 secretion in colon cancer cells**

Zongwei Li<sup>1,3#</sup>, Ming Zhuang<sup>2#</sup>, Lichao Zhang<sup>1</sup>, Xingnan Zheng<sup>4</sup>, Peng Yang<sup>1</sup>, Zhuoyu Li<sup>1\*</sup>

<sup>1</sup>Institute of Biotechnology, Key Laboratory of Chemical Biology and Molecular Engineering of National Ministry of Education, Shanxi University, Taiyuan, 030006, China.

<sup>2</sup>General Surgical Department, Xinhua Hospital Affiliated to Shanghai Jiao Tong University School of Medicine, Shanghai, 200092, China

<sup>3</sup>Department of Lymphoma and Myeloma, Division of Cancer Medicine, Center for Cancer Immunology Research, The University of Texas MD Anderson Cancer Center, Houston, Texas, USA

<sup>4</sup>Lineberger Comprehensive Cancer Center, University of North Carolina School of Medicine, Chapel Hill, North Carolina 27599, USA

#The first two authors contributed equally to this work.

**\*Corresponding Author: Zhuoyu Li**

Institute of Biotechnology, Key Laboratory of Chemical Biology and Molecular Engineering of National Ministry of Education, Shanxi University, Taiyuan 030006, China

Tel: 86-351-7018268, Fax: 86-351-7018268, Email: lzy@sxu.edu.cn.

Fig.1A

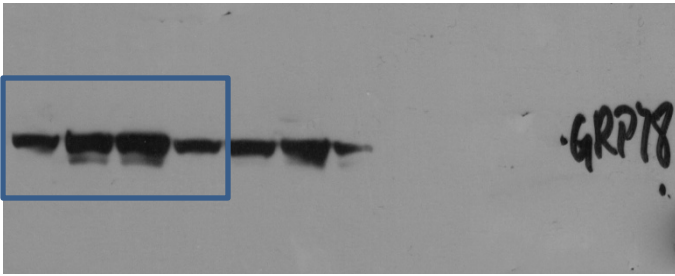

Fig.1B

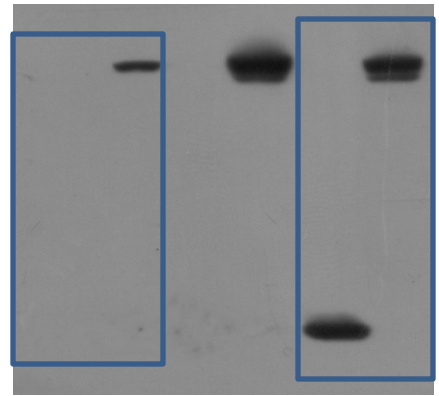

Fig.1C

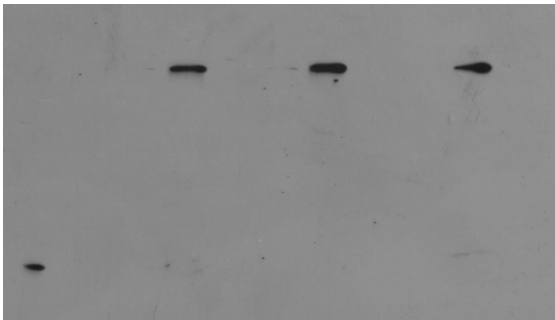

Fig. 1D

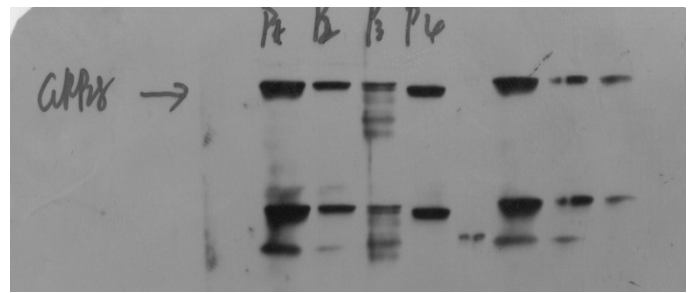

Fig.2A

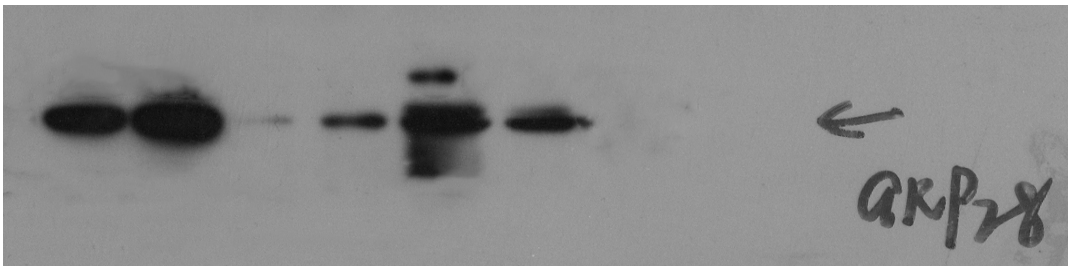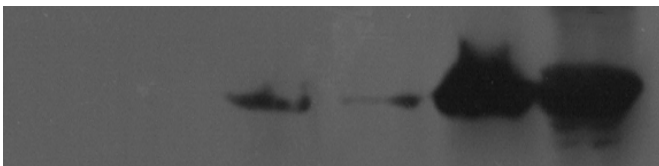

Fig.2B

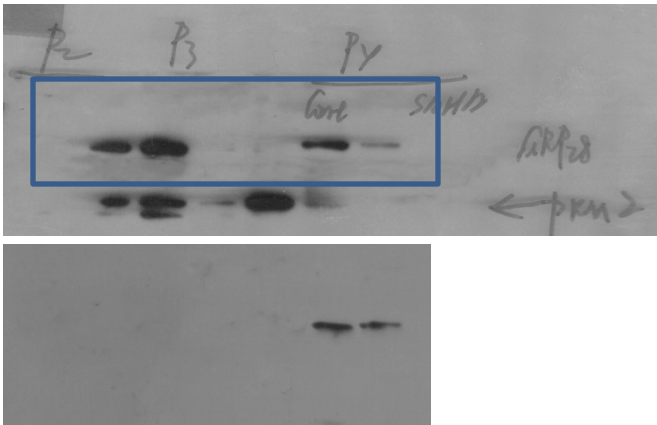

Fig.2C

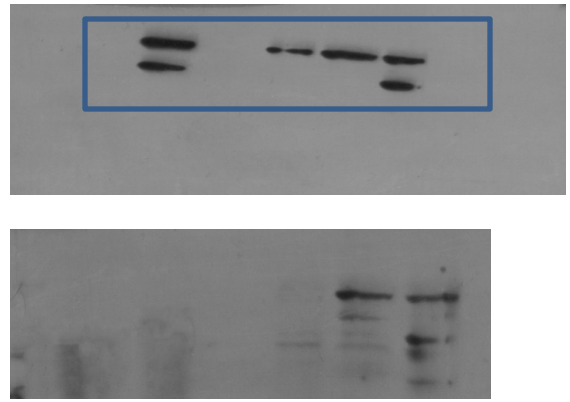

Fig.2D

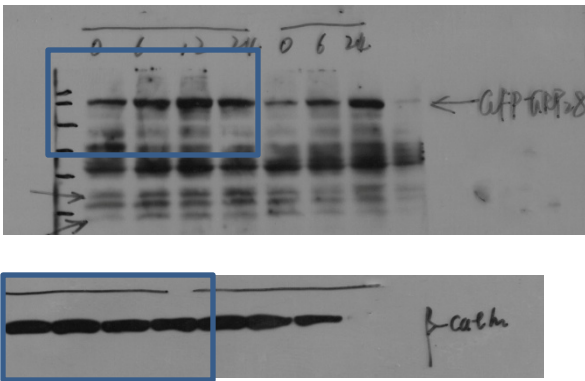

Fig. 3B

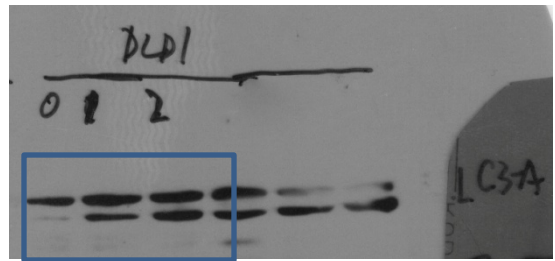

Fig.4D

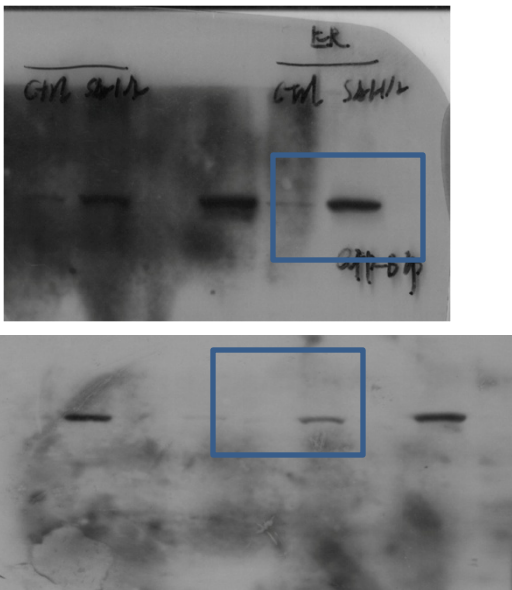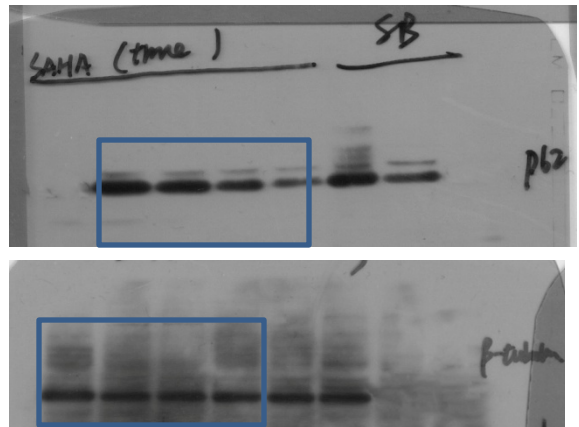

Fig.5B

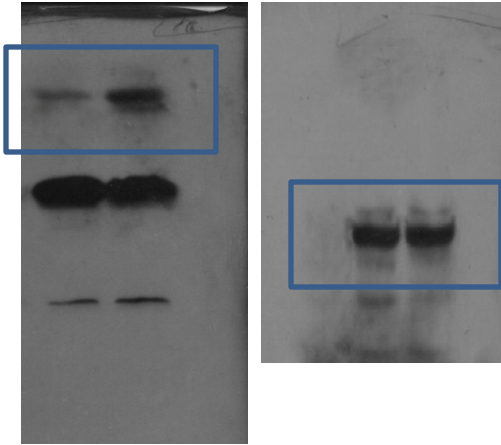

Fig.5E

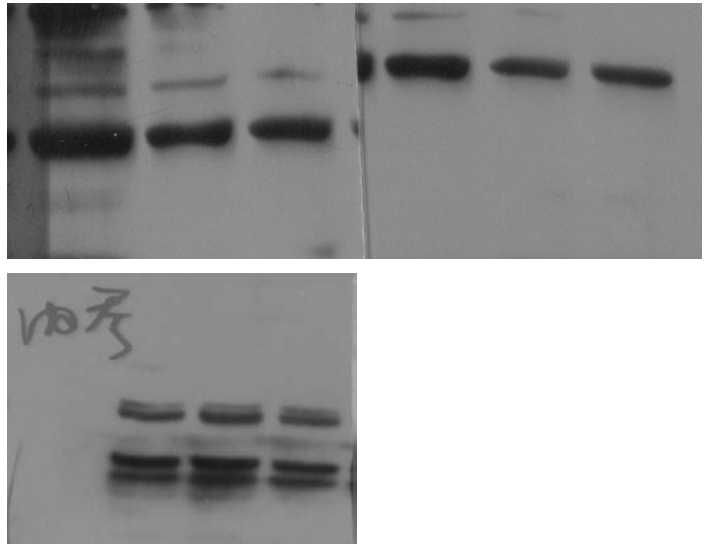

Fig. 6B

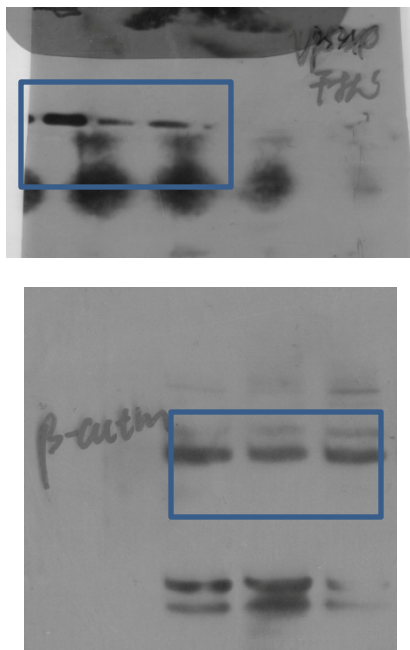

Fig.6C

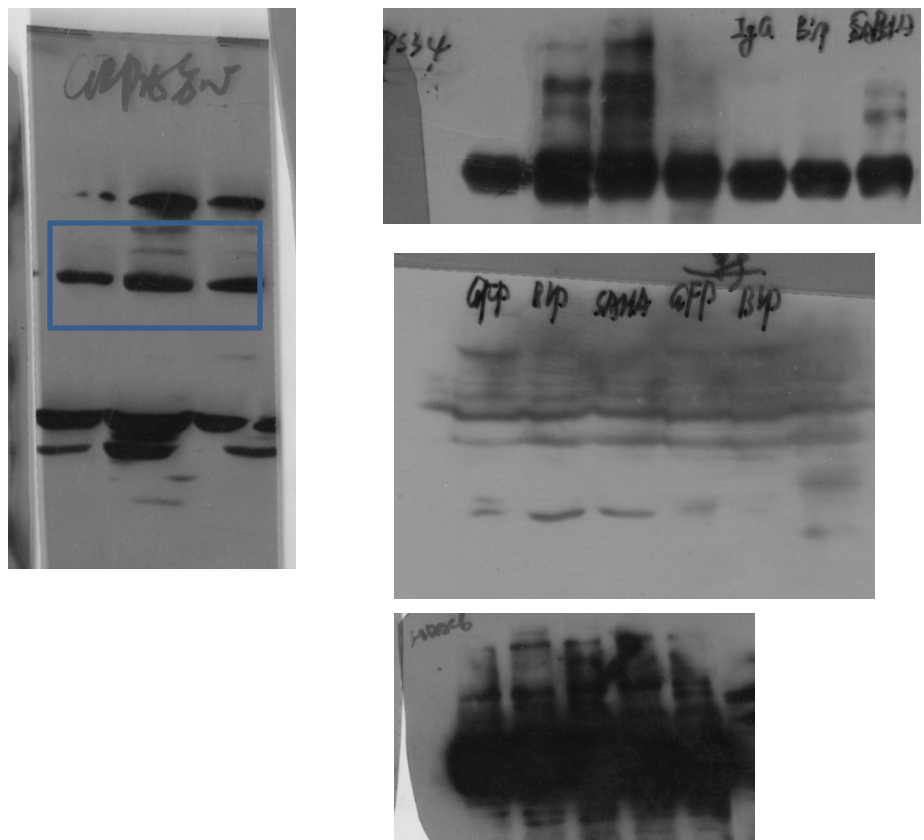

Fig. 6D

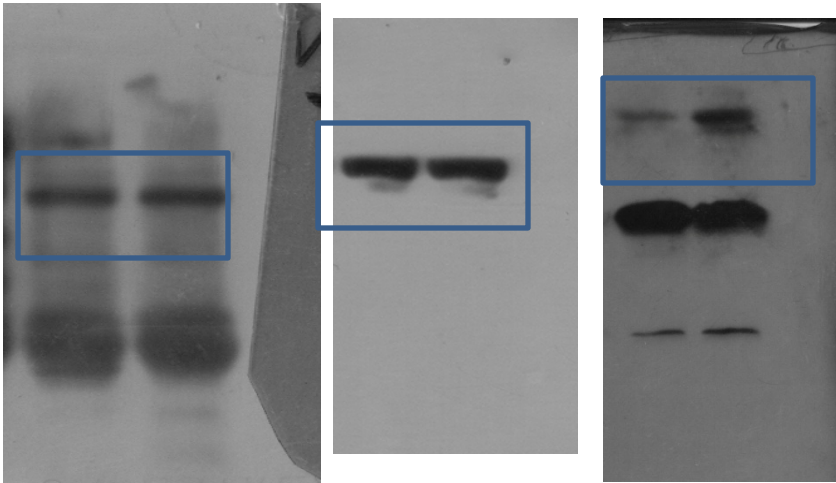

Fig. 6E

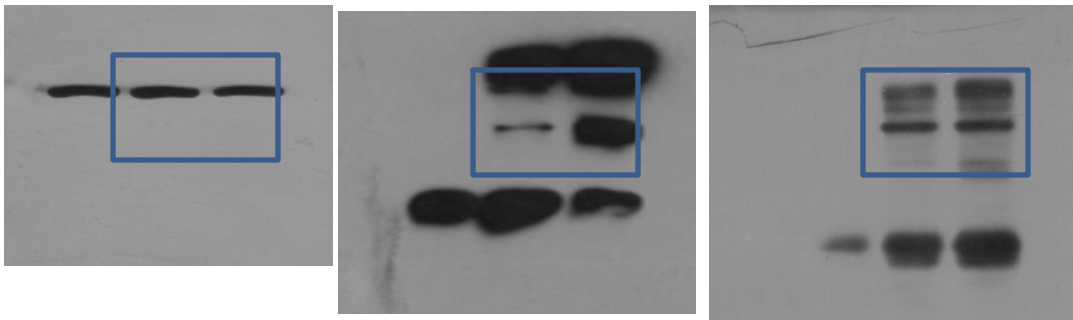

Fig. 7A

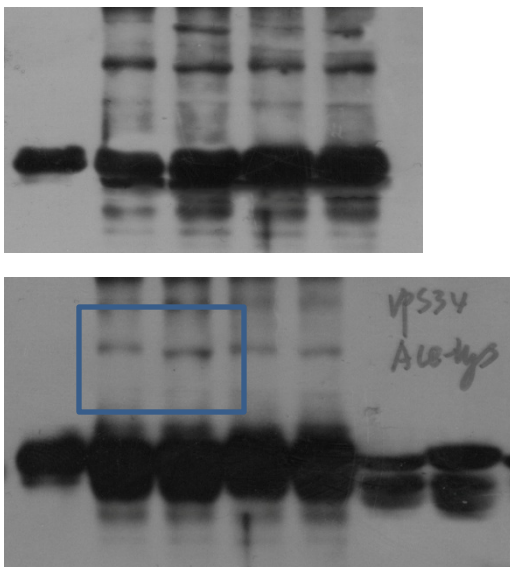

Fig. 7B

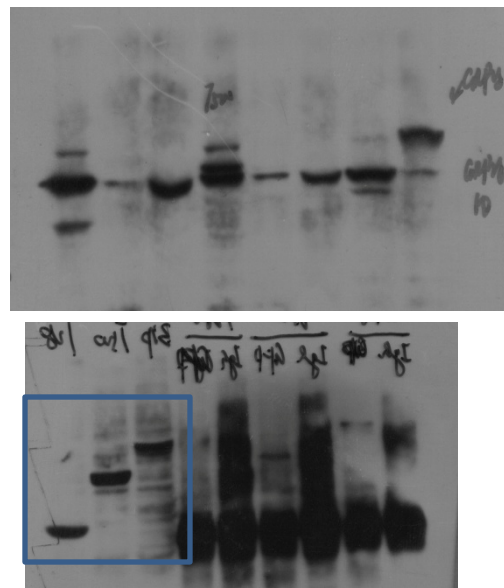

Fig.7C

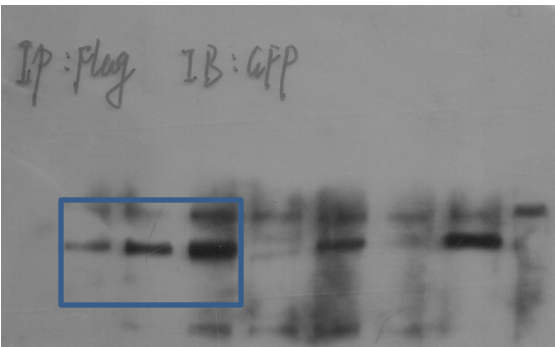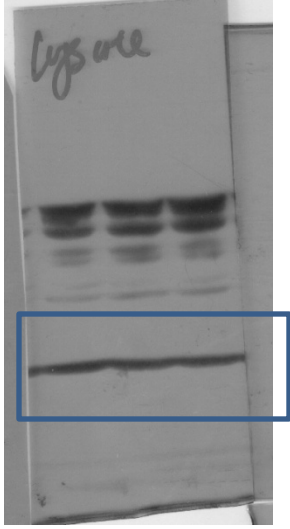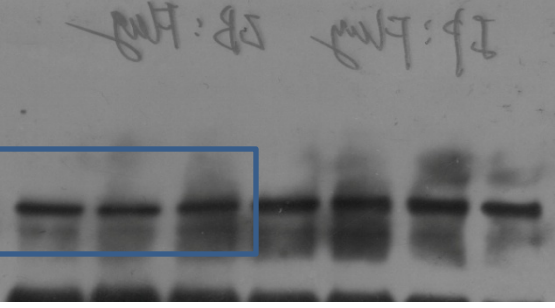

Fig. 7E

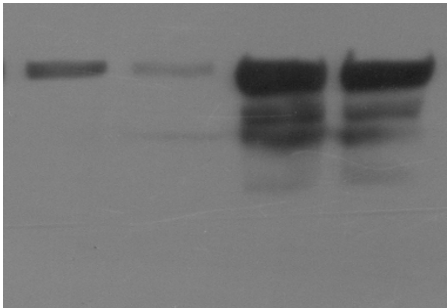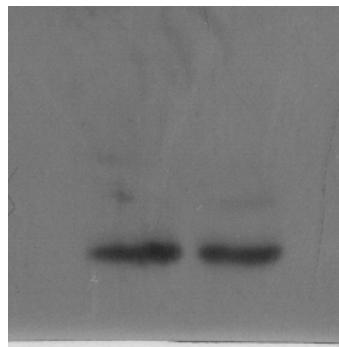

Supplement: srep30406-s1.pdf [file srep30406-s1.pdf]
